# Supplementary material
Source: PubMed Central journal article supplement (PMC3347669)
Supplement: supp_2011.050203_2011_050203-Contributions.pdf [file supp_2011.050203_2011_050203-Contributions.pdf]

**Manuscript no. HAEMATOL/2011/050203 entitled “Detection of minimal residual disease following induction immunochemotherapy predicts progression free survival in mantle cell lymphoma: final results of CALGB 59909”**

**Authors: Hongtao Liu, Jeffrey L. Johnson, Greg Koval, Greg Malnassy, Dorie Sher, Lloyd E. Damon, Eric D. Hsi, Donna Marie Bucci, Charles A. Linker, Bruce D. Cheson and Wendy Stock**

**Information about the contributions of each person named as having participated in the study**

**1) Guarantor(s)**, i.e., person(s) who is (are) responsible for the integrity of the work as a whole:  
• Wendy Stock, University of Chicago wstock@medicine.bsd.uchicago.edu

According to the International Committee of Medical Journal Editors (ICMJE) ([http://www.icmje.org/ethical\\_1author.html](http://www.icmje.org/ethical_1author.html)): “Authorship credit should be based on: 1) substantial contributions to conception and design, acquisition of data, or analysis and interpretation of data; 2) drafting the article or revising it critically for important intellectual content; and 3) final approval of the version to be published. Authors should meet conditions 1, 2, and 3 ..... Acquisition of funding, collection of data, or general supervision of the research group alone does not constitute authorship”.

The guarantors of this manuscript confirm that all persons designated as authors qualify for authorship, and that each author has participated sufficiently in the work to take public responsibility for appropriate portions of the content.

2) Authors who participated in the **conception of the study**: Lloyd E. Damon, Charles A. Linker, Wendy Stock, Bruce D. Cheson

3) **Design & Methods**. The following authors were responsible for specific investigations  
• Lloyd E. Damon, Charles A. Linker, Bruce D. Cheson, Wendy Stock were responsible for study design  
• Jeffrey L. Johnson was responsible for statistical design  
• Eric D. His, Hongtao Liu and Wendy Stock were responsible for correlative study design

4) **Results**. The following authors were responsible for specific portions of the results, including figures and tables  
• Hongtao Liu, Dorie Sher, Greg Malnassy, Greg Koval and Donna Marie Bucci, Wendy Stock were responsible for sample preparation, MRD assays and generation of all MRD results.  
• Jeffrey L. Johnson created all of the tables and survival curves  
• Eric D. His performed the Ki-67 and PIM1 analysis

5) **Writing the manuscript**. The following authors were responsible for writing the manuscript:  
• Hongtao Liu and Wendy Stock wrote the manuscript  
• Jeffrey L. Johnson provided all statistical analysis for the manuscript  
• Bruce D. Cheson, Charles A. Linker, Lloyd E. Damon, Eric D. His, Dorie Sher, Greg Malnassy, Greg Koval edited the manuscript

6) **Contributors Listed in Acknowledgments**:

Dr. W Stock received funding from the Lymphoma Research Foundation correlative sciences grant for the minimal residual disease analysis. Dr. W. Stock received funding assistance from the CALGB chairman’s award for performance of all of the correlative science studies, and we acknowledge the support of Amgen corporation for financial support of the correlative studies.
